# Supplementary material
Source: PubMed Central journal article supplement (PMC8417202)

### A5389

C C T A T A G T A G C C T T G A T G A A G A C T T C C T C A A  
P 220 I V A L 230 M K T 240 S S

Chr3:52430526 (G>A)

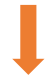

Allele 1

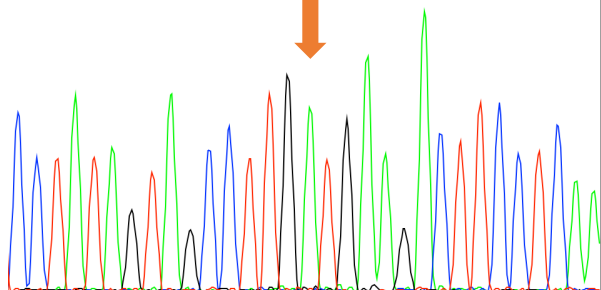

C C T A T A G T A G C C T T G G T G A A G A C T T C C T C A A  
S Y S S L G E D F L N  
230 240 250

WT

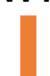

Allele 2

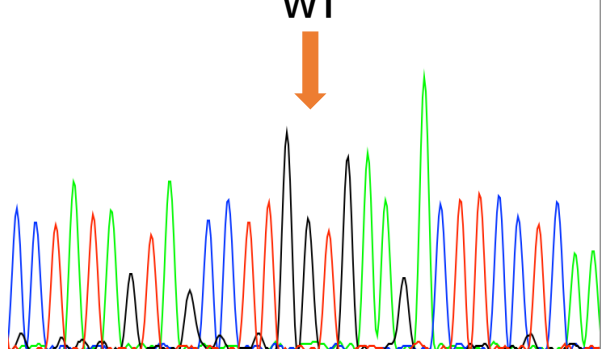

T G A C G T G C T C T C C C G A G C A C A G C T A  
\* R A 700 L P S 710 A

Chr3:52430998 (CCT>C)

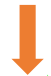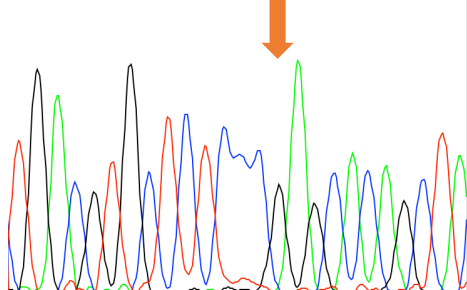

T G A C G T G C T C T C C C T G A G C A C A G C T A  
L T C S P L S T A  
700 710 720

WT

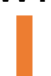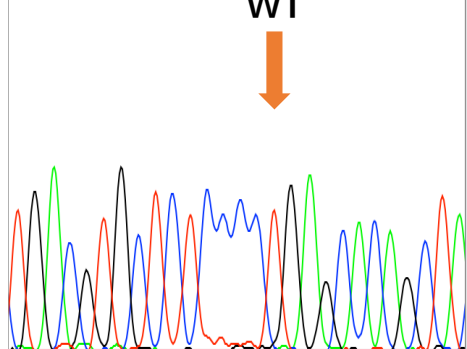

### A6254

C C T A T A G T A G C C T T G G T G A A G A C T T C C T C A A  
S Y S S L D E D F L N  
230 240 250

Chr3:52430526 (G>A)

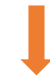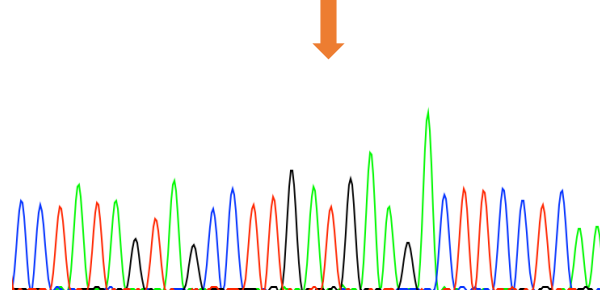

C C T A T A G T A G C C T T G G T G A A G A C T T C C T C A A  
L \* \* P W \* R L P Q  
220 230 240

WT

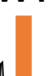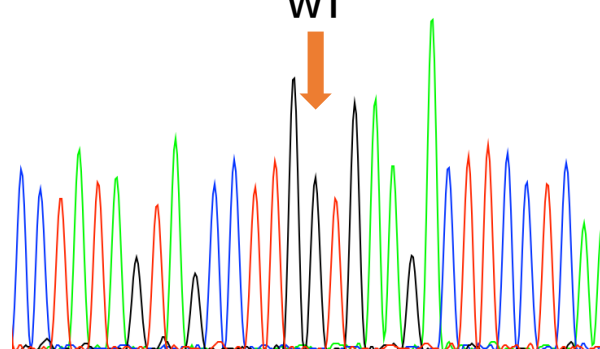

T G A C G T G C T C T C C C G A G C A C A G C T A  
L T C S P E H S Y  
710 720

Chr3:52430998 (CCT>C)

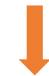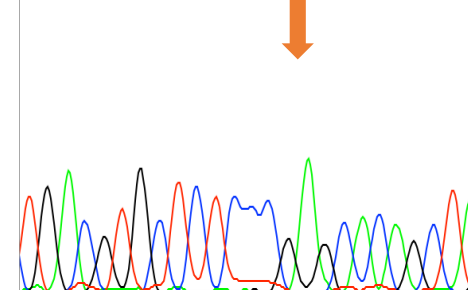

T G A C G T G C T C T C C C T G A G C A C A G C T A  
L T C S P L S T A  
690 700 710

WT

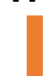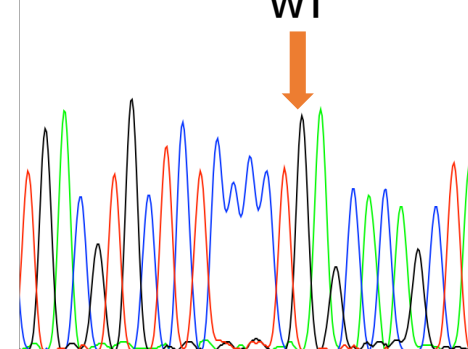

Supplement: 10815_2021_2201_MOESM1_ESM.pdf [file 10815_2021_2201_MOESM1_ESM.pdf]
